# Supplementary material for: Liraglutide mitigates dexamethasone-induced fatty acid synthase (FASN) and the cluster of differentiation36 (CD36) expression: a potential treatment for glucocorticoid-induced non-alcoholic fatty liver disease (NAFLD)
Source: Springer Nature journal article supplement (doi:10.1007/s00210-025-03789-6), 2025-01-17

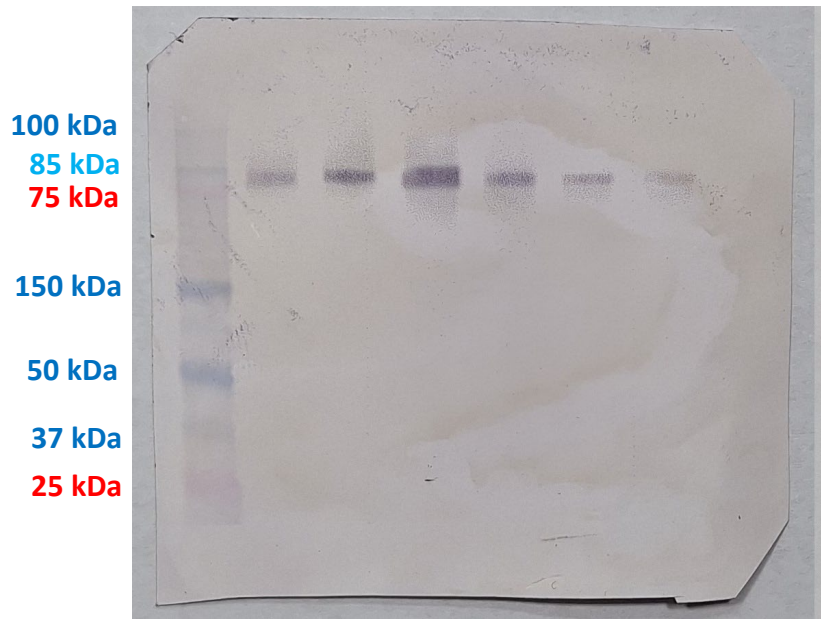

**CD36**

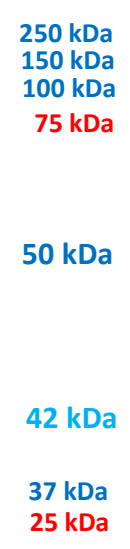

**FASN**

**β-actin**

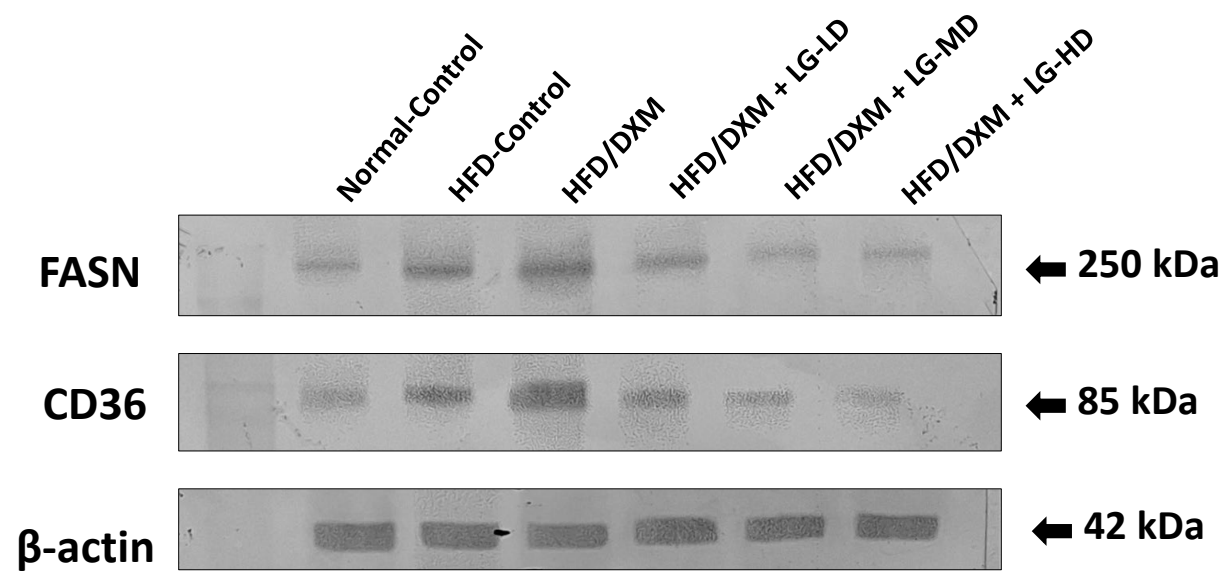

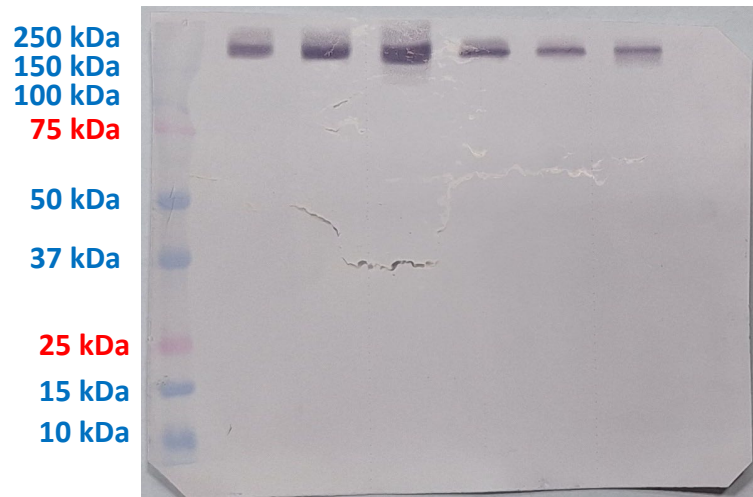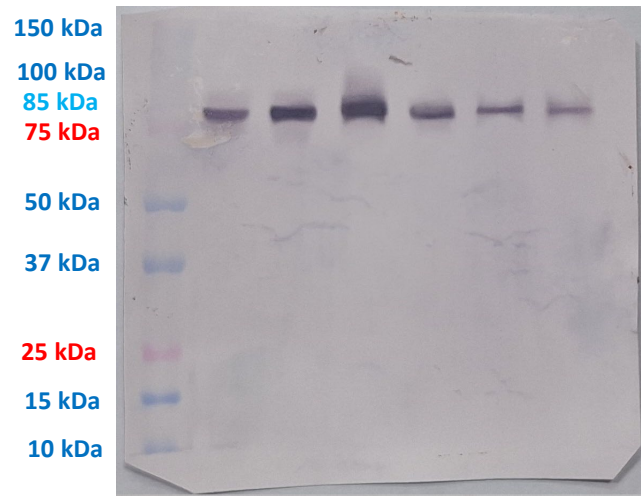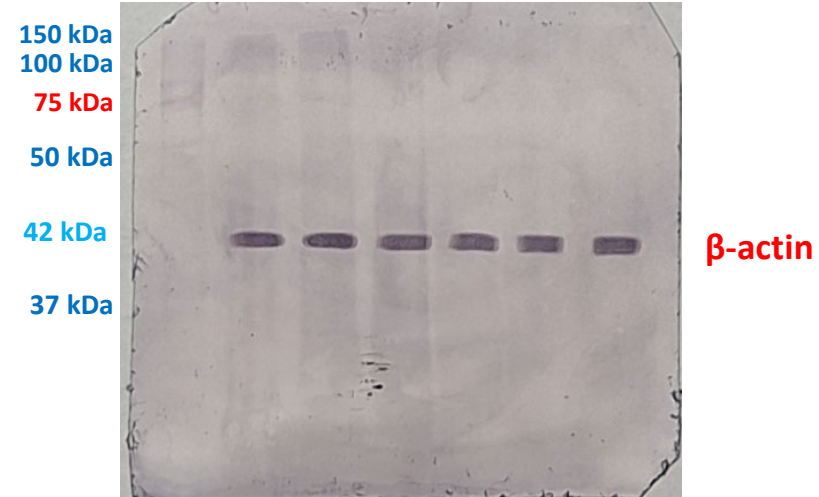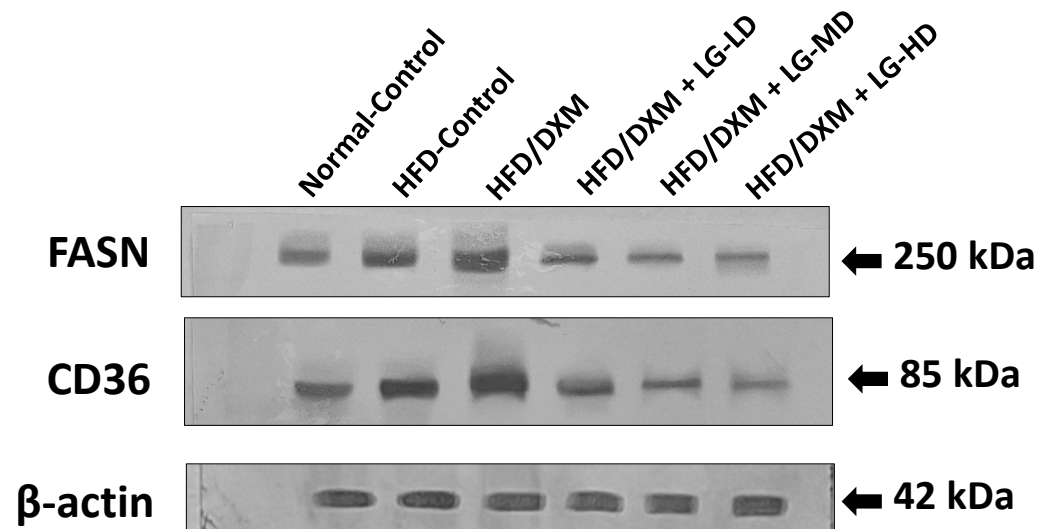

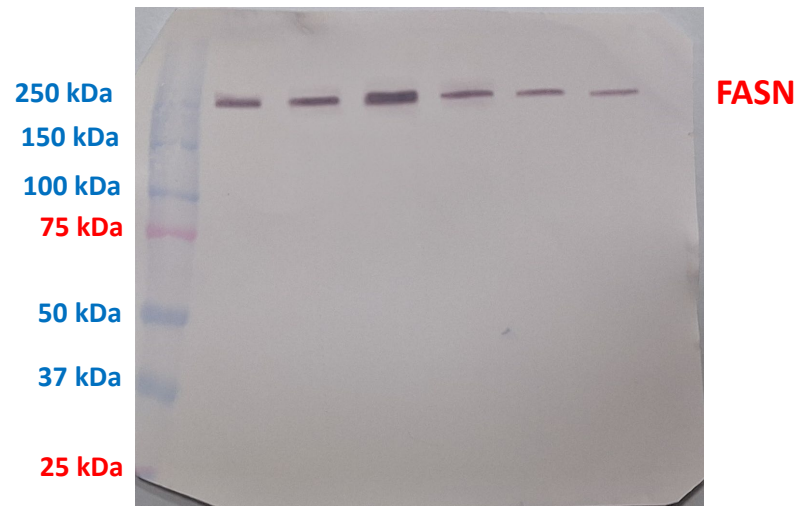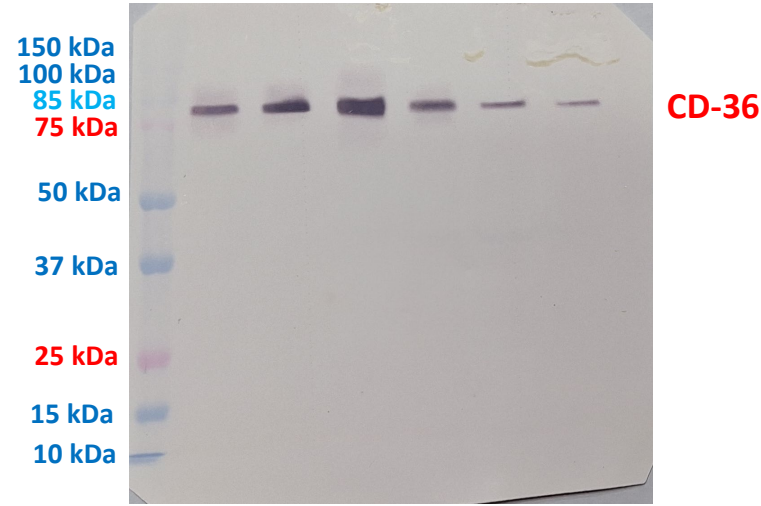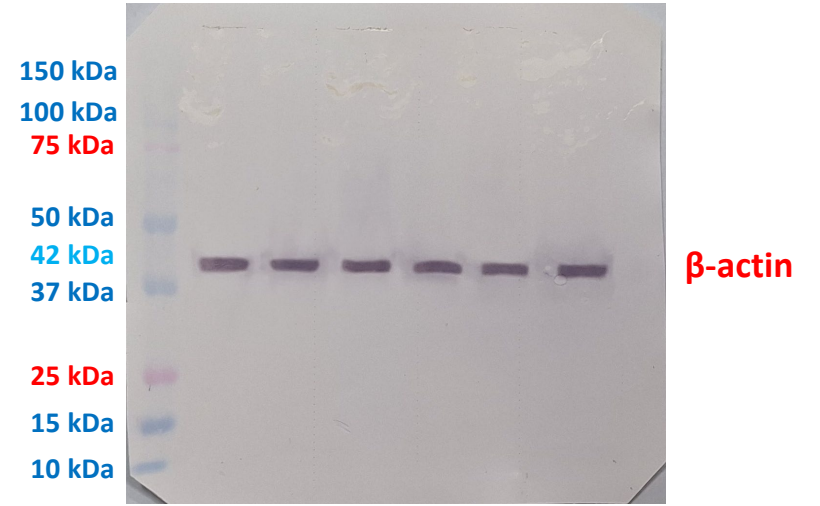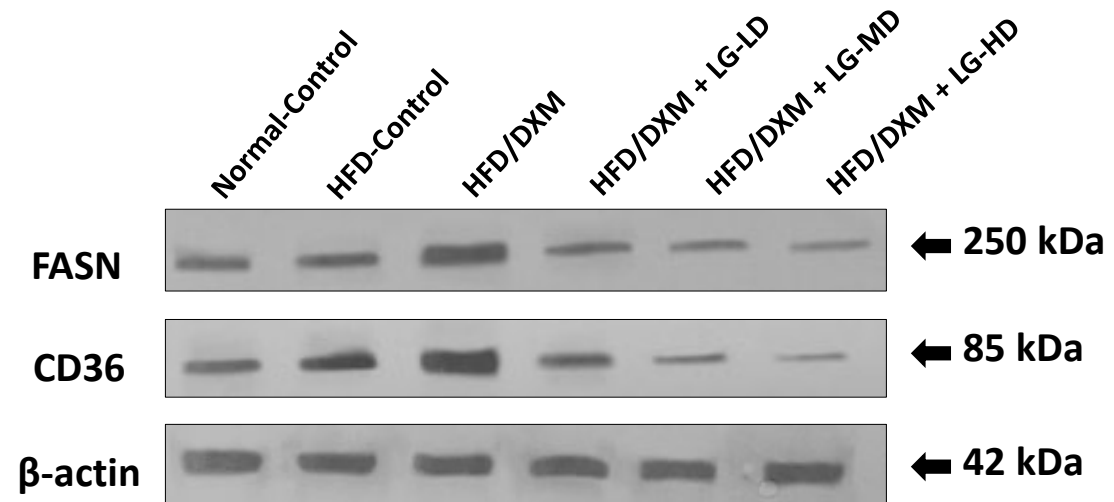

Supplement: MOESM3 [file 210_2025_3789_MOESM3_ESM.pdf]
